# Supplementary material for: Isolation and Characterisation of Electrogenic Bacteria from Mud Samples
Source: MDPI journal article supplement (doi:10.3390/microorganisms11030781), 2023-03-17

## Supplementary Figure S1.

SEM images of the biofilm forming capacities of each mud isolate bacteria on the pretreated PXFT-35 carbon tissue on 23 °C after 3 days incubation.

1. *Enterobacter koebel*

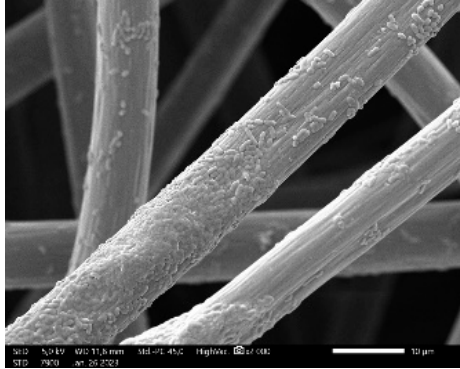

4. *Enterococcus faecalis*

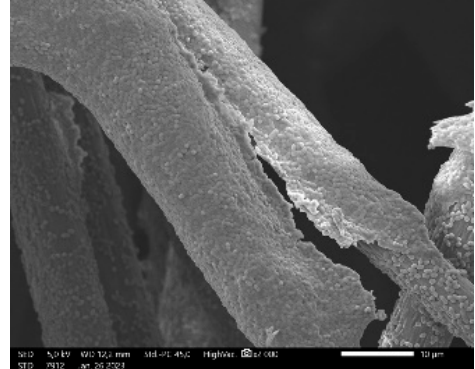

2. *Aeromonas salmonicida*

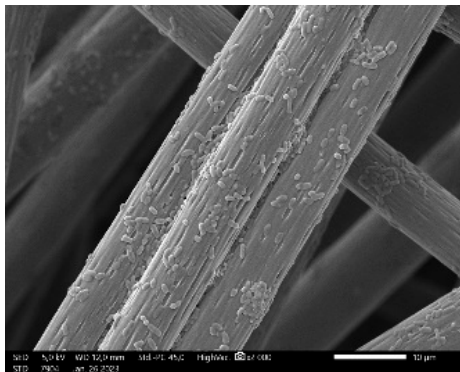

5. *Enterococcus faecalis*

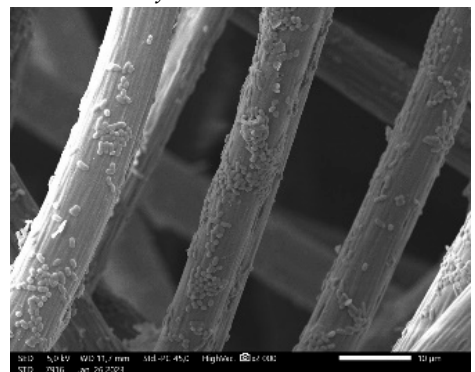

3. *Aeromonas salmonicida*

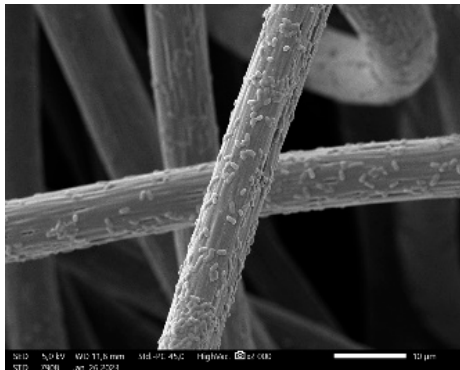

6. *Aeromonas salmonicida*

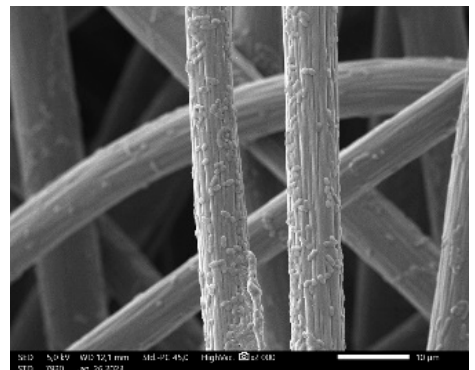

7. *Aeromonas hydrophila*

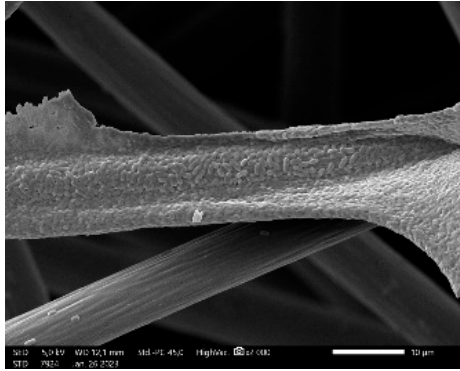

11. *Bacillus cereus*

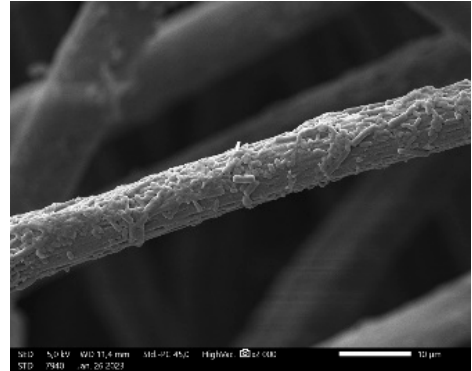

8. *Enterococcus faecalis*

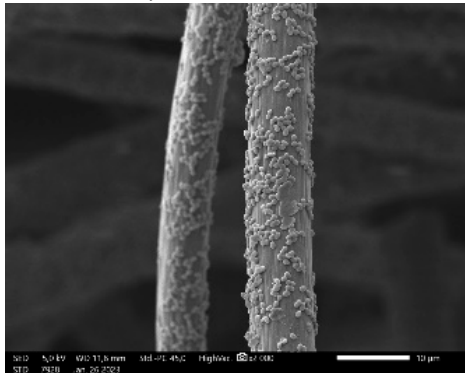

12. *Aeromonas salmonicida*

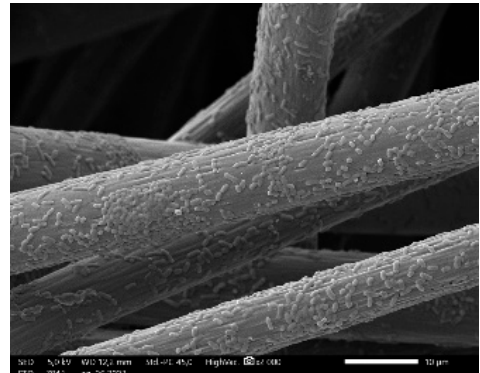

9. *unknown*

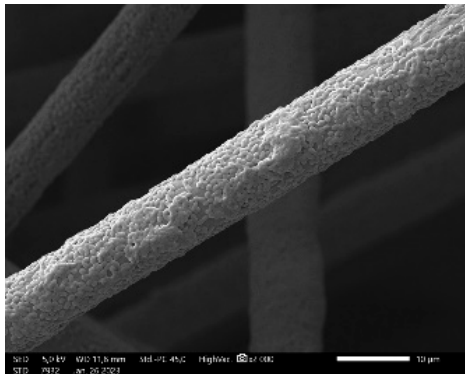

13. *Providencia alkalifaciens*

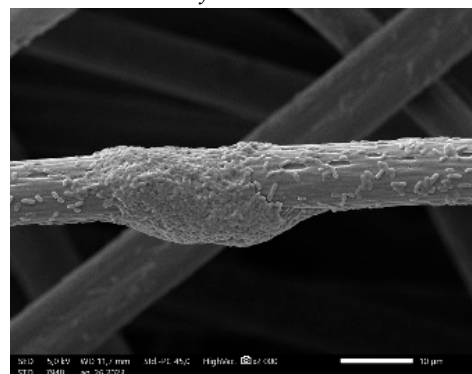

10. *unknown*

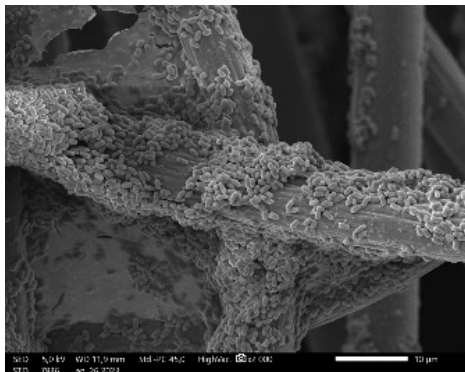

14. *Aeromonas salmonicida*

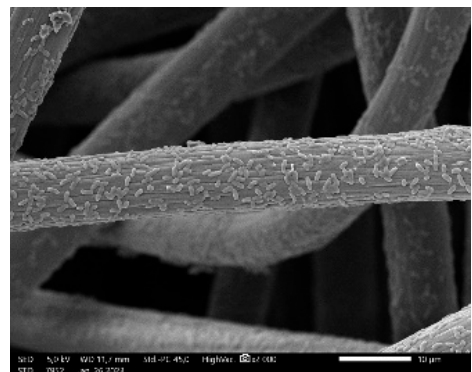

15. *Carnobacterium divergens*

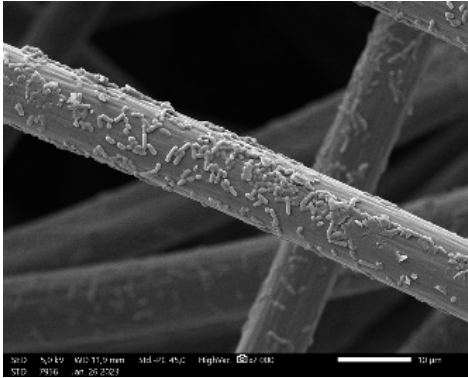

19. *Shewanella baltica*

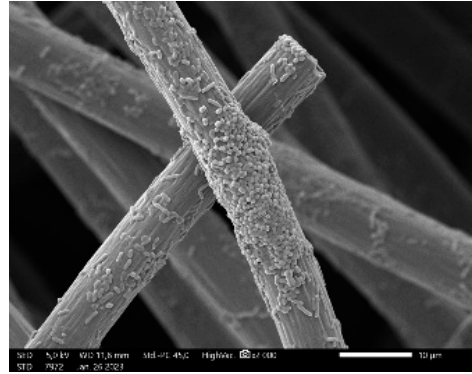

16. *Aeromonas ichthiosoma*

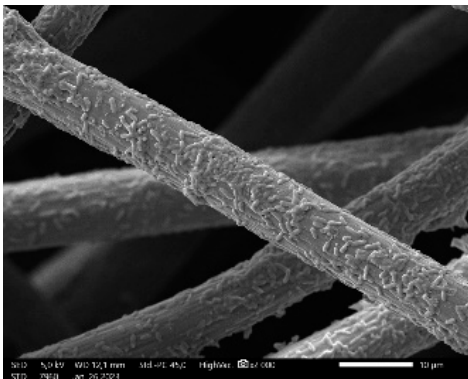

20. *Shewanella baltica*

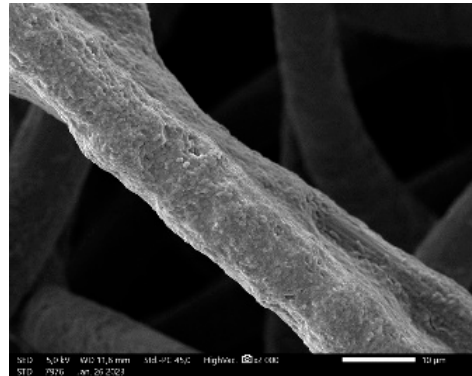

17. *Citrobacter braakii*

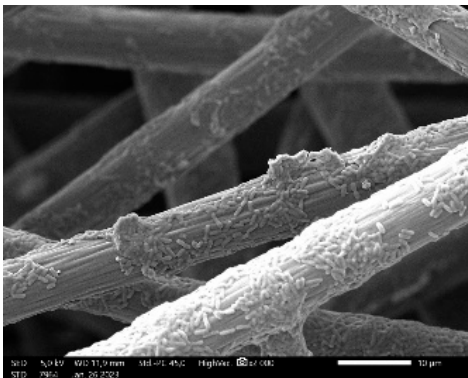

21. *Shewanella baltica*

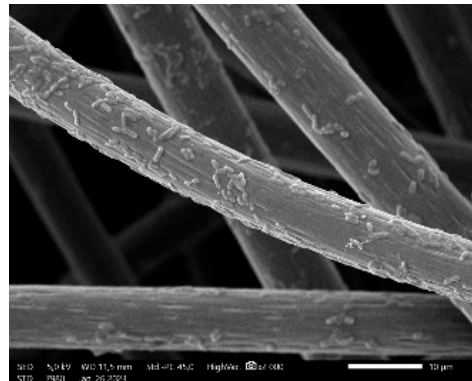

18. *Shewanella baltica*

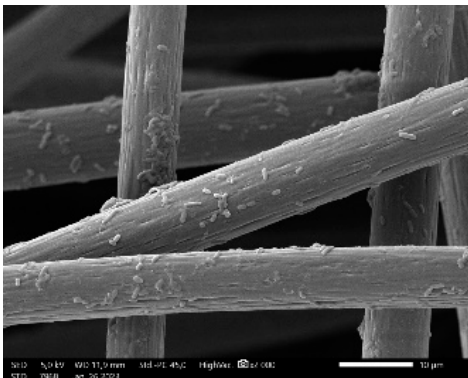

22. *Shewanella baltica*

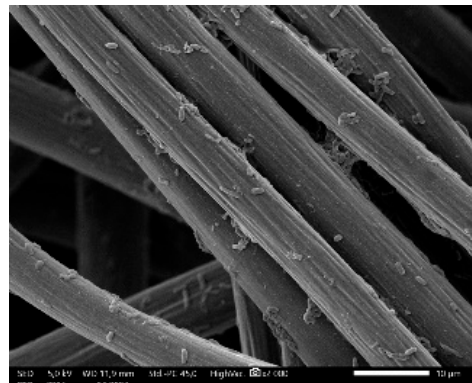

23. *Lelliotittia amnigena*

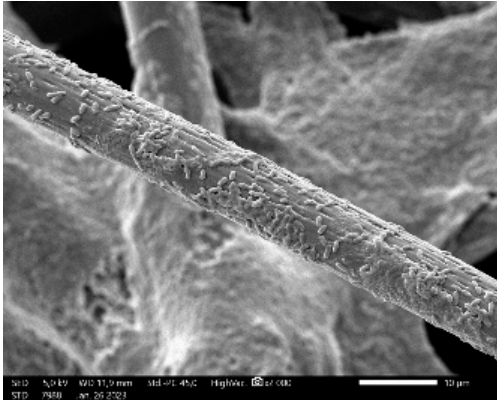

27. *Salmonella* sp.

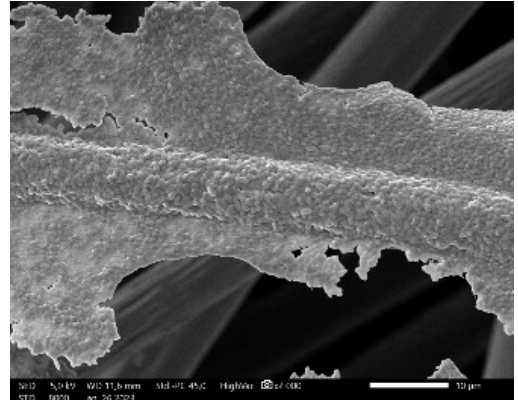

24. *Enterococcus faecium*

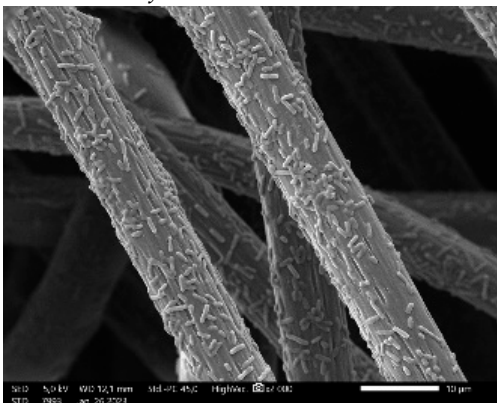

28. *Escherichia coli*

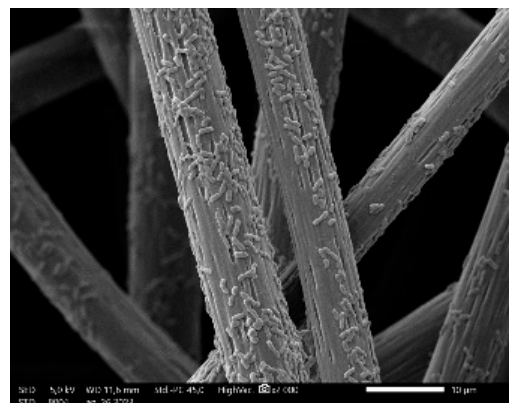

25. *Staphylococcus epidermidis*

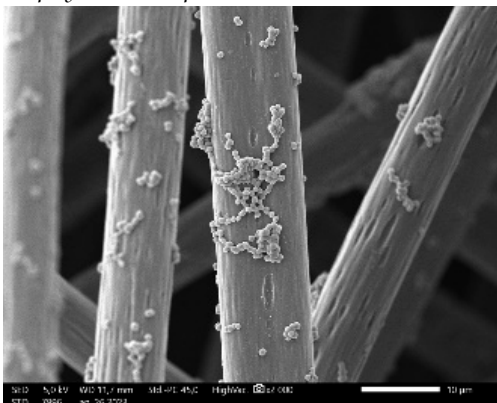

29. *Salmonella* sp.

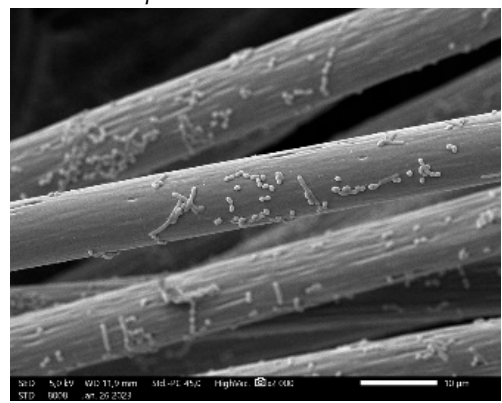

26. *Enterococcus hirae*

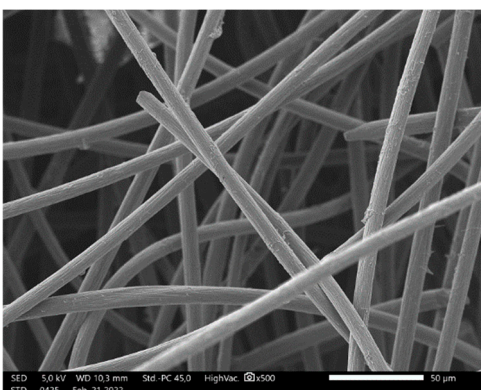

30. *Klebsiella pneumoniae*

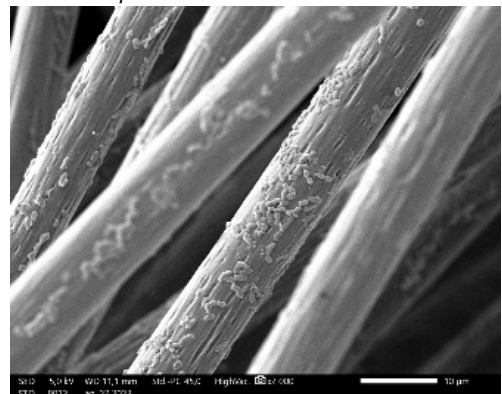



31. *unknown*

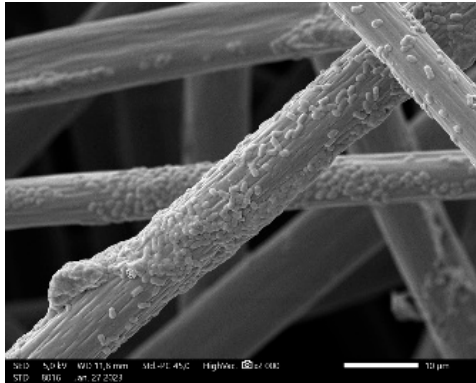

35. *Aeromonas veronii*

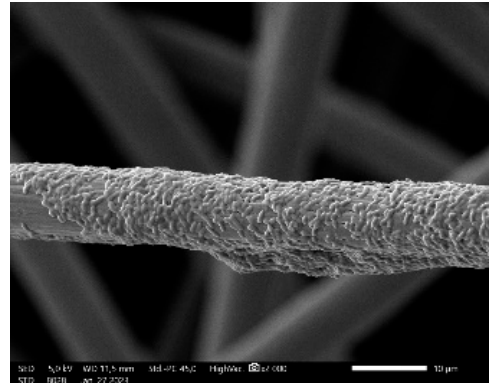

32. *unknown*

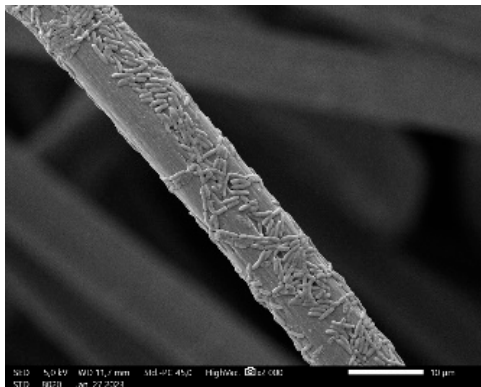

36. *Buttiauxella ferraguitiae*

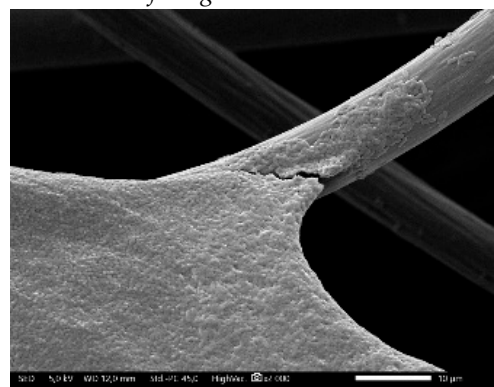

33. *Pleisomonas shigelloides*

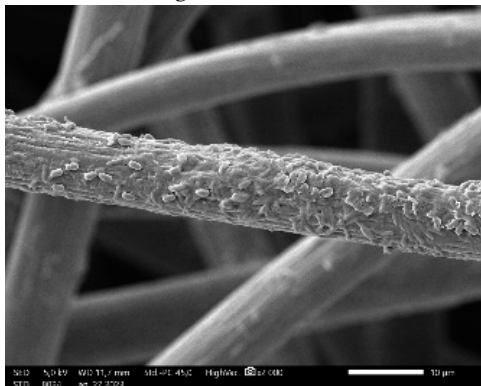

37. *Citrobacter brakkii*

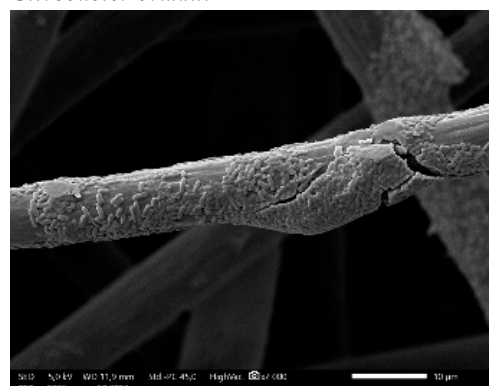

34. *Aeromonas ichtiosmia*

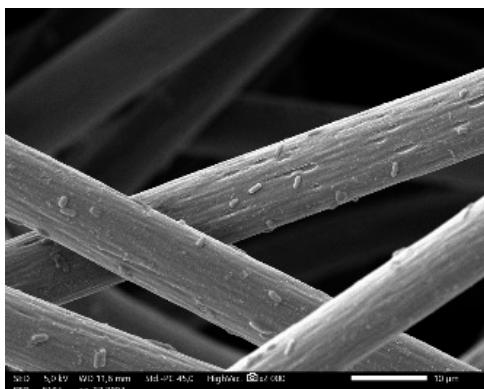

38. *Aeromonas veronii*

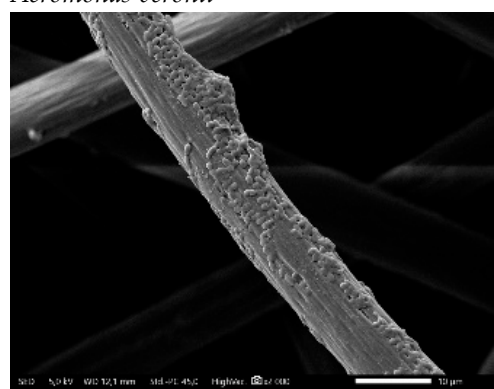

39. *Enterococcus faecium*

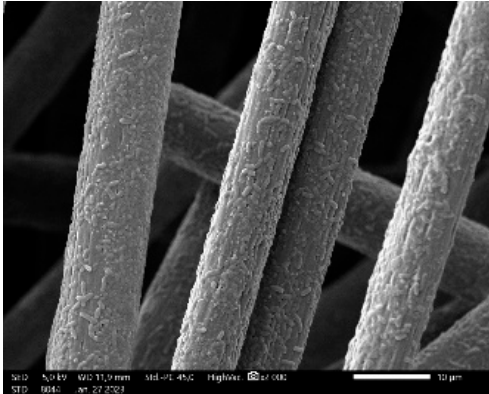

43. *Citrobacter freundii*

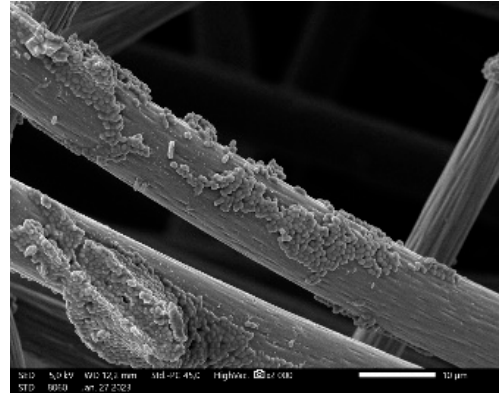

40. *E. coli*

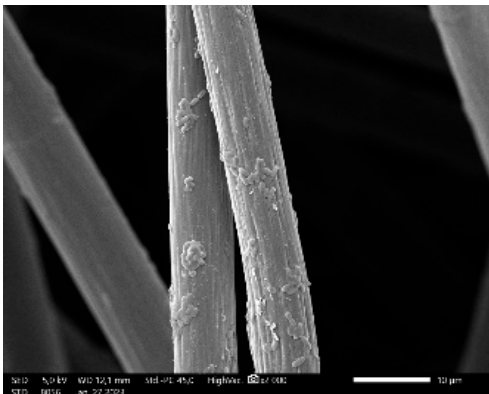

44. *Citrobacter freundii*

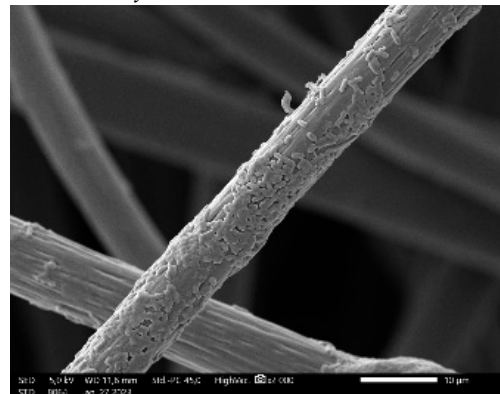

41. *Citrobacter brakkii*

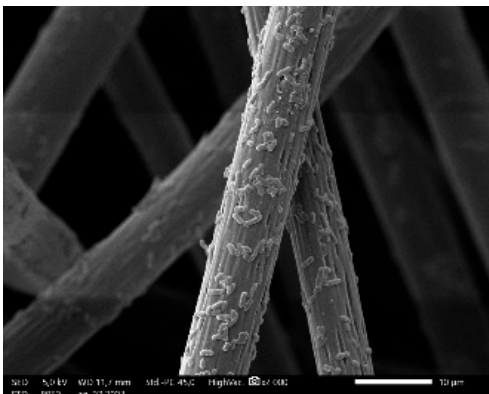

45. *Citrobacter gillenii*

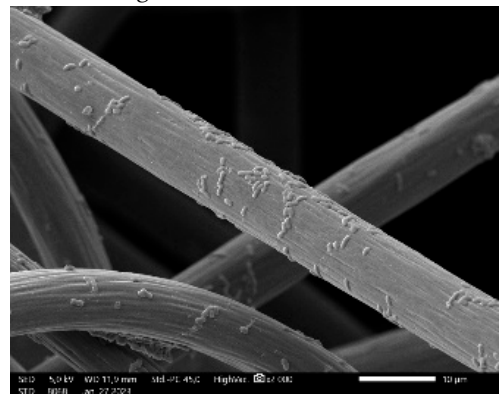

42. *Lactobacillus lactis*

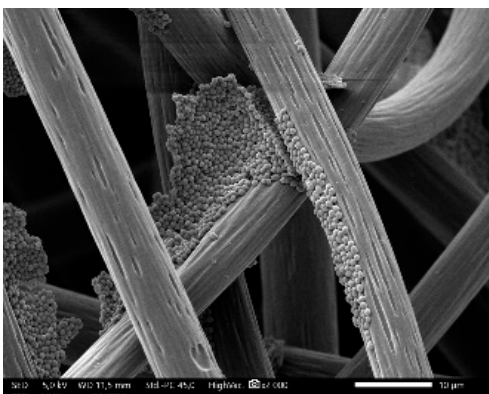

46. *Lactococcus lactis*

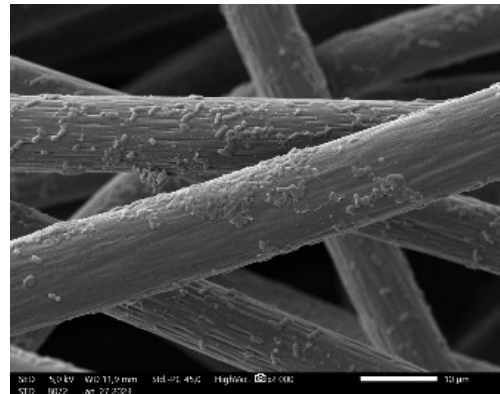

47. *Aeromonas veronii*

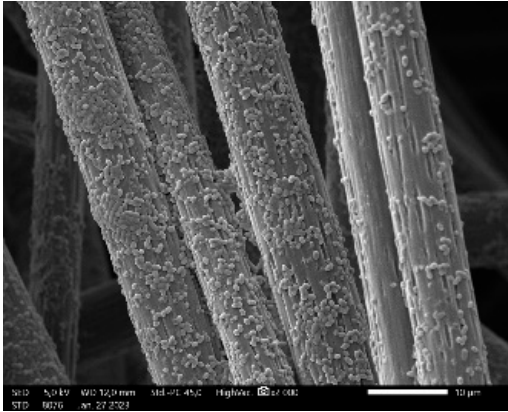

50. *Citrobacter braakii*

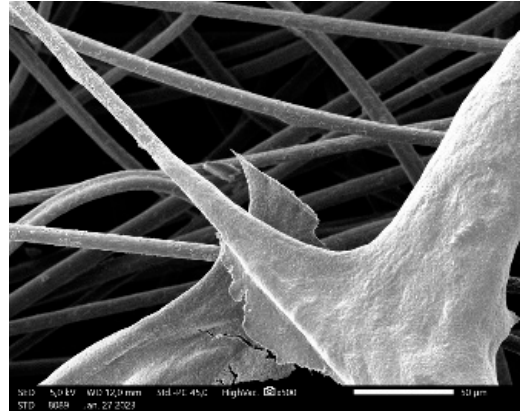

48. *Lactococcus lactis*

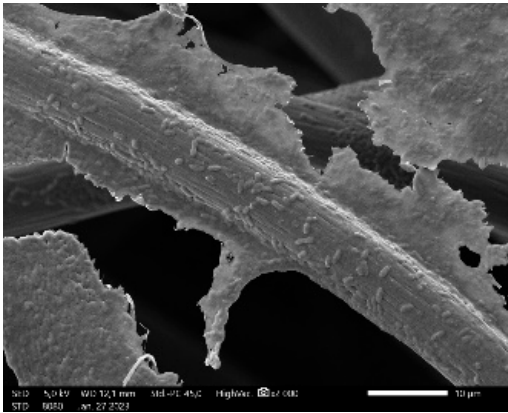

51. *Lactococcus lactis*

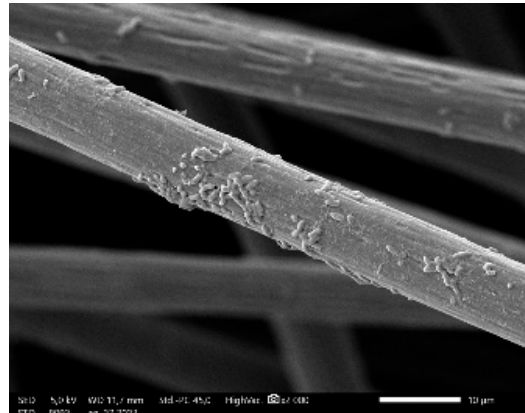

49. *Citrobacter freundii*

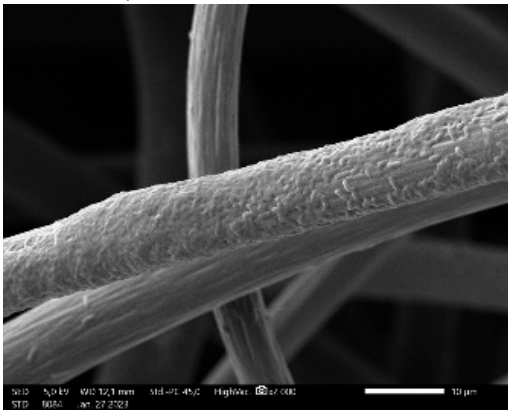

52. *Pantoea agglomerans*

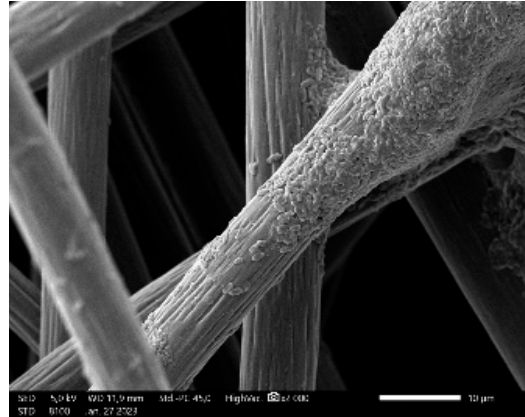

Supplement: s1 [file s1]
